# Supplementary material
Source: PubMed Central journal article supplement (PMC3927544)
Supplement: jn.113.183731_nutrition183731SupplementaryData1.pdf [file jn.113.183731_nutrition183731SupplementaryData1.pdf]

## Online Supporting Material

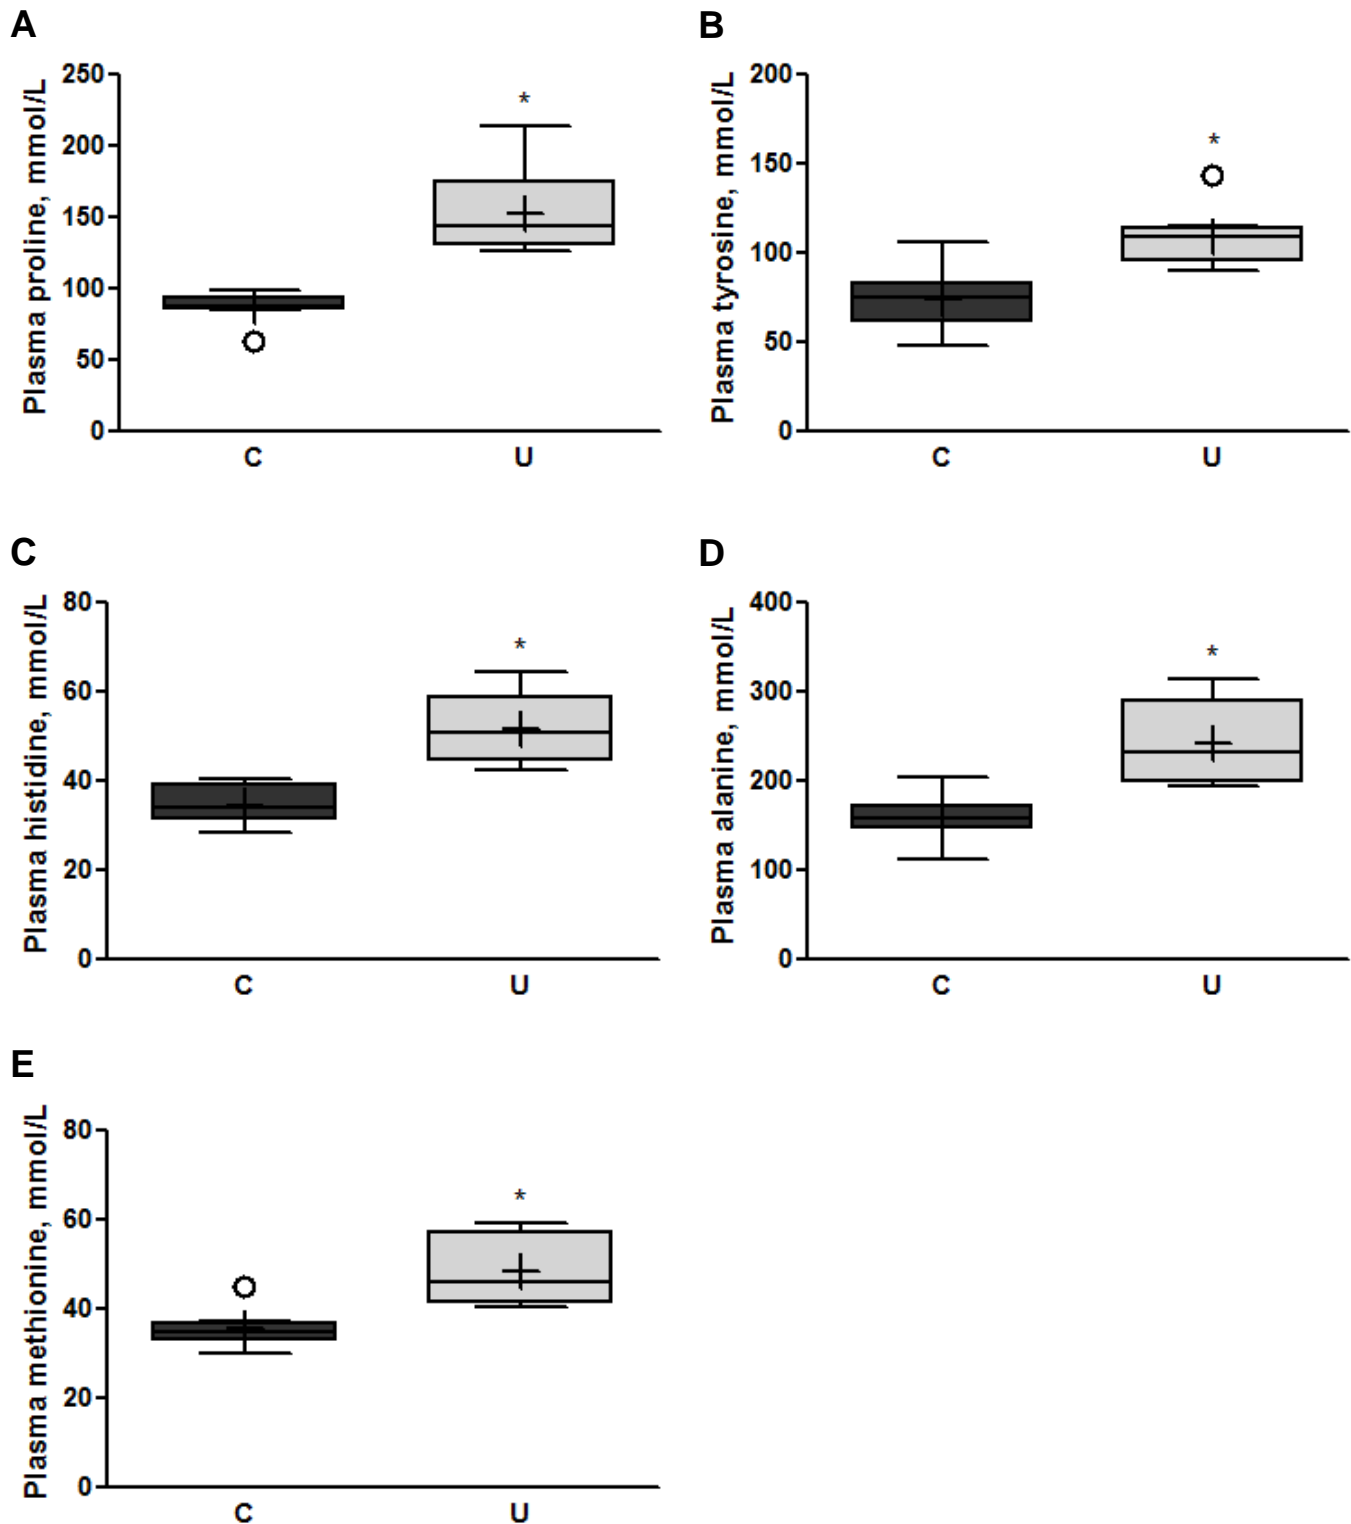

**Supplemental Figure 1.** Plasma concentrations of proline (A), tyrosine (B), histidine (C), alanine (D), and methionine (E) of C and U mice at 16 d of age

The top and bottom of the boxes represent the interquartile range with the solid line representing the median, the plus sign representing the mean, the bars (whiskers) representing the range of data points excluding extreme points which are labeled with open circles (these points were included in all statistical analyses), and open circles represent outliers,  $n = 8$  (pools of 4 littermate pups). \* Different from C,  $P < 0.001$ . C, control pups, U, pups separated from their dams for 4 h at 5-d-old, 8 h at 6-d-old, and 12 h at 7- to 15-d-old.
