# Supplementary material
Source: PubMed Central journal article supplement (PMC3927544)
Supplement: jn.113.183731_nutrition183731SupplementaryData2.pdf [file jn.113.183731_nutrition183731SupplementaryData2.pdf]

Online Supporting Material

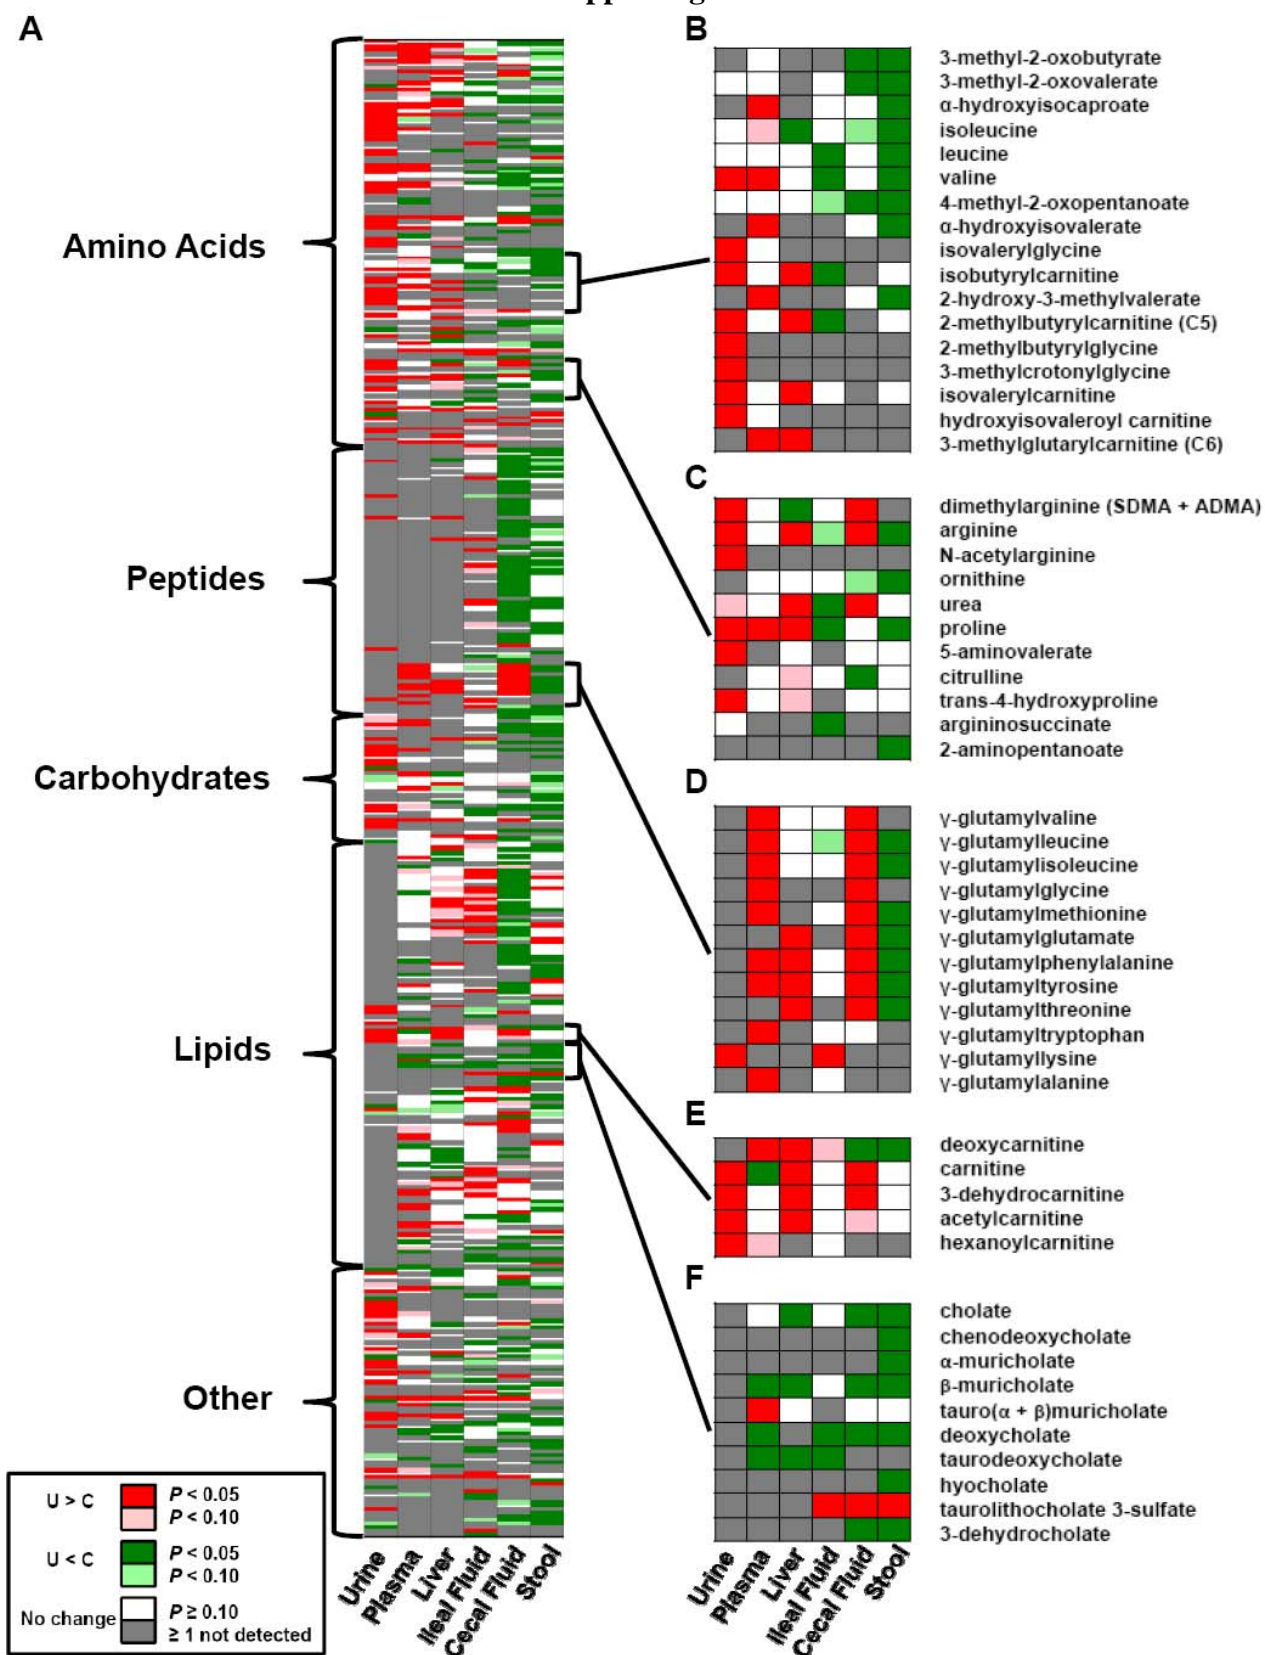

**Supplemental Figure 2.** Urine, plasma, liver, ileal fluid, cecal fluid, and stool metabolites showing change in U compared to C mice at d 16 of age. Global heat map (A), BCAA catabolism (B), urea cycle metabolites (C),  $\gamma$ -glutamyl peptides (D), carnitine metabolism (E), bile acids (F);  $n = 8$  (pools of 4 littermate pups). BCAA, branched-chain amino acid; C, control pups; U, pups separated from their dams for 4 h at 5-d-old, 8 h at 6-d-old, and 12 h at 7- to 15-d-old.
