# Supplementary material
Source: PubMed Central journal article supplement (PMC3927544)
Supplement: jn.113.183731_nutrition183731SupplementaryData4.pdf [file jn.113.183731_nutrition183731SupplementaryData4.pdf]

## Online Supporting Material

**Supplemental Table 2.** Plasma metabolites that differed ( $P \leq 0.10$ ) between C and U mice at d 16 of age<sup>1</sup>

| Metabolite                            | Method    | FC   | P                     | Q                     | Pathway                                                  |
|---------------------------------------|-----------|------|-----------------------|-----------------------|----------------------------------------------------------|
| Urobilinogen                          | LC/MS neg | 4.51 | 0.0004                | 0.0052                | Hemoglobin and porphyrin metabolism                      |
| Galactose                             | GC/MS     | 3.90 | 0.0003                | 0.0045                | Fructose, mannose, galactose, starch, sucrose metabolism |
| Phenyllactate (PLA)                   | LC/MS neg | 3.19 | 0.0005                | 0.0058                | Phenylalanine & tyrosine metabolism                      |
| 2-hydroxyisobutyrate                  | GC/MS     | 3.16 | $2.19 \times 10^{-1}$ | $4.10 \times 10^{-9}$ | Chemical                                                 |
| $\alpha$ -hydroxyisovalerate          | GC/MS     | 2.39 | $1.75 \times 10^{-7}$ | $1.64 \times 10^{-5}$ | Valine, leucine and isoleucine metabolism                |
| $\gamma$ -glutamylalanine             | LC/MS pos | 2.13 | 0.0005                | 0.0058                | $\gamma$ -glutamyl                                       |
| 3-methylglutaryl carnitine (C6)       | LC/MS pos | 2.12 | $4.41 \times 10^{-5}$ | 0.0012                | Valine, leucine and isoleucine metabolism                |
| $\alpha$ -hydroxyisocaproate          | LC/MS neg | 2.01 | $6.89 \times 10^{-5}$ | 0.0015                | Valine, leucine and isoleucine metabolism                |
| Homoserine                            | GC/MS     | 2.01 | 0.0009                | 0.0075                | Glycine, serine and threonine metabolism                 |
| 4-guanidinobutanoate                  | LC/MS pos | 1.88 | $2.23 \times 10^{-5}$ | 0.001                 | Guanidino and acetamido metabolism                       |
| Stearoyl sphingomyelin                | GC/MS     | 1.86 | 0.0017                | 0.012                 | Sphingolipid                                             |
| Pyroglutamine                         | LC/MS pos | 1.84 | 0.0033                | 0.0175                | Glutamate metabolism                                     |
| 2-palmitoylglycerol (2-monopalmitin)  | LC/MS neg | 1.83 | 0.0068                | 0.0272                | Monoacylglycerol                                         |
| Sarcosine (N-Methylglycine)           | GC/MS     | 1.82 | 0.0053                | 0.0233                | Glycine, serine and threonine metabolism                 |
| 2-linoleoylglycerol (2-monolinolein)  | LC/MS neg | 1.8  | 0.0057                | 0.0244                | Monoacylglycerol                                         |
| 1-linoleoylglycerophosphoethanolamine | LC/MS neg | 1.75 | 0.0019                | 0.013                 | Lysolipid                                                |
| 4-vinylphenol sulfate                 | LC/MS neg | 1.73 | 0.077                 | 0.1367                | Benzoate metabolism                                      |
| 2-aminobutyrate                       | GC/MS     | 1.72 | 0.0085                | 0.0322                | Butanoate metabolism                                     |
| Dimethylglycine                       | GC/MS     | 1.70 | $5.56 \times 10^{-6}$ | 0.0003                | Glycine, serine and threonine metabolism                 |
| Phenol sulfate                        | LC/MS neg | 1.70 | 0.0069                | 0.0272                | Phenylalanine & tyrosine metabolism                      |
| 1-linoleoylglycerol (1-monolinolein)  | LC/MS neg | 1.68 | 0.0144                | 0.0449                | Monoacylglycerol                                         |
| 1-palmitoylglycerol (1-monopalmitin)  | LC/MS neg | 1.67 | 0.007                 | 0.0272                | Monoacylglycerol                                         |
| Betaine                               | LC/MS pos | 1.65 | $4.08 \times 10^{-5}$ | 0.0012                | Glycine, serine and threonine metabolism                 |
| 2-hydroxybutyrate (AHB)               | GC/MS     | 1.64 | $2.76 \times 10^{-5}$ | 0.001                 | Cysteine, methionine, SAM, taurine metabolism            |
| 2-linoleoylglycerophosphoethanolamine | LC/MS neg | 1.63 | 0.0104                | 0.0361                | Lysolipid                                                |
| $\gamma$ -glutamyltyrosine            | LC/MS pos | 1.61 | $7.00 \times 10^{-5}$ | 0.0015                | $\gamma$ -glutamyl                                       |
| $\gamma$ -glutamylglycine             | GC/MS     | 1.60 | 0.0091                | 0.0322                | $\gamma$ -glutamyl                                       |
| $\gamma$ -glutamylmethionine          | LC/MS pos | 1.59 | 0.0234                | 0.0626                | $\gamma$ -glutamyl                                       |
| Glutaryl carnitine (C5)               | LC/MS pos | 1.57 | 0.0021                | 0.0136                | Lysine metabolism                                        |
| Gulono-1,4-lactone                    | GC/MS     | 1.57 | 0.0025                | 0.0148                | Ascorbate and aldarate metabolism                        |
| Alanine                               | LC/MS pos | 1.56 | 0.0007                | 0.0075                | Alanine and aspartate metabolism                         |
| Ophthalmate                           | LC/MS pos | 1.55 | 0.0188                | 0.0541                | Glutathione metabolism                                   |
| Serine                                | GC/MS     | 1.55 | 0.0243                | 0.0636                | Glycine, serine and threonine metabolism                 |
| Proline                               | LC/MS pos | 1.50 | 0.0001                | 0.002                 | Urea cycle; arginine-, proline-, metabolism              |
| 2-hydroxy-3-methylvalerate            | LC/MS neg | 1.47 | 0.0067                | 0.0272                | Valine, leucine and isoleucine metabolism                |
| Indolelactate                         | GC/MS     | 1.45 | 0.0004                | 0.0052                | Tryptophan metabolism                                    |
| 3-(4-hydroxyphenyl)lactate            | LC/MS neg | 1.45 | 0.0014                | 0.0102                | Phenylalanine & tyrosine metabolism                      |
| N-acetylneuraminic acid               | GC/MS     | 1.45 | 0.0087                | 0.0322                | Aminosugars metabolism                                   |
| 1-myristoylglycerol (1-monomyristin)  | LC/MS neg | 1.45 | 0.0936                | 0.1569                | Monoacylglycerol                                         |
| $\gamma$ -glutamyltryptophan          | LC/MS pos | 1.44 | 0.0031                | 0.0175                | $\gamma$ -glutamyl                                       |
| $\gamma$ -glutamylphenylalanine       | LC/MS pos | 1.43 | 0.0007                | 0.0075                | $\gamma$ -glutamyl                                       |
| Asparagine                            | GC/MS     | 1.43 | 0.0381                | 0.0884                | Alanine and aspartate metabolism                         |
| Tyrosine                              | LC/MS pos | 1.42 | 0.0002                | 0.0042                | Phenylalanine & tyrosine metabolism                      |
| N-acetylserine                        | GC/MS     | 1.39 | 0.0009                | 0.0075                | Glycine, serine and threonine metabolism                 |
| Palmitoyl sphingomyelin               | GC/MS     | 1.39 | 0.0023                | 0.0139                | Sphingolipid                                             |
| Glycerate                             | GC/MS     | 1.38 | 0.0044                | 0.0211                | Glycolysis, gluconeogenesis, pyruvate metabolism         |
| Deoxycarnitine                        | LC/MS pos | 1.37 | 0.0316                | 0.0776                | Carnitine metabolism                                     |
| Threonine                             | LC/MS pos | 1.35 | 0.019                 | 0.0541                | Glycine, serine and threonine metabolism                 |
| Pantothenate                          | LC/MS pos | 1.34 | 0.0135                | 0.0436                | Pantothenate and CoA metabolism                          |
| Adenosine                             | LC/MS pos | 1.34 | 0.0137                | 0.0436                | Purine metabolism, adenine containing                    |
| 2-ethylhexanoate                      | GC/MS     | 1.33 | 0.0651                | 0.1294                | Chemical                                                 |
| Tauro( $\alpha + \beta$ )muricholate  | LC/MS neg | 1.32 | 0.009                 | 0.0322                | Bile acid metabolism                                     |

## Online Supporting Material

|                                                       |           |      |        |        |                                                          |
|-------------------------------------------------------|-----------|------|--------|--------|----------------------------------------------------------|
| 1-methylimidazoleacetate                              | LC/MS pos | 1.32 | 0.0151 | 0.0457 | Histidine metabolism                                     |
| $\gamma$ -glutamylleucine                             | LC/MS pos | 1.32 | 0.0244 | 0.0636 | $\gamma$ -glutamyl                                       |
| Nicotinamide adenine dinucleotide (NAD <sup>+</sup> ) | LC/MS neg | 1.31 | 0.0178 | 0.0529 | Nicotinate and nicotinamide metabolism                   |
| Docosapentaenoate (n6 DPA; 22:5n6)                    | LC/MS neg | 1.29 | 0.0047 | 0.0215 | Essential fatty acid                                     |
| Campesterol                                           | GC/MS     | 1.29 | 0.0738 | 0.1355 | Sterol/Steroid                                           |
| Methionine                                            | LC/MS pos | 1.28 | 0.0008 | 0.0075 | Cysteine, methionine, SAM, taurine metabolism            |
| $\gamma$ -glutamylvaline                              | LC/MS pos | 1.28 | 0.0032 | 0.0175 | $\gamma$ -glutamyl                                       |
| Erythronate                                           | GC/MS     | 1.28 | 0.0036 | 0.0182 | Aminosugars metabolism                                   |
| Ribitol                                               | GC/MS     | 1.28 | 0.0463 | 0.1023 | Nucleotide sugars, pentose metabolism                    |
| N-acetylglycine                                       | GC/MS     | 1.26 | 0.0603 | 0.1217 | Glycine, serine and threonine metabolism                 |
| N-acetylalanine                                       | LC/MS neg | 1.26 | 0.0655 | 0.1294 | Alanine and aspartate metabolism                         |
| Arabinose                                             | GC/MS     | 1.25 | 0.0864 | 0.1461 | Nucleotide sugars, pentose metabolism                    |
| Caprate (10:0)                                        | LC/MS neg | 1.24 | 0.0751 | 0.1355 | Medium chain fatty acid                                  |
| 1-stearoylglycerophosphoethanolamine                  | LC/MS neg | 1.23 | 0.074  | 0.1355 | Lysolipid                                                |
| Glycine                                               | GC/MS     | 1.22 | 0.3075 | 0.3225 | Glycine, serine and threonine metabolism                 |
| N4-acetylcytidine                                     | LC/MS pos | 1.22 | 0.0034 | 0.0178 | Pyrimidine metabolism, cytidine containing               |
| Hexanoylcarnitine                                     | LC/MS pos | 1.22 | 0.0566 | 0.117  | Carnitine metabolism                                     |
| Tauroursodeoxycholate                                 | LC/MS neg | 1.22 | 0.0829 | 0.1414 | Bile acid metabolism                                     |
| Histidine                                             | LC/MS neg | 1.21 | 0.0011 | 0.0087 | Histidine metabolism                                     |
| $\gamma$ -glutamylisoleucine                          | LC/MS pos | 1.21 | 0.0479 | 0.1045 | $\gamma$ -glutamyl                                       |
| Glutamine                                             | LC/MS pos | 1.20 | 0.0306 | 0.0776 | Glutamate metabolism                                     |
| Taurocholate                                          | LC/MS neg | 1.20 | 0.0694 | 0.1327 | Bile acid metabolism                                     |
| Cholesterol                                           | GC/MS     | 1.19 | 0.0208 | 0.0583 | Sterol/Steroid                                           |
| Valine                                                | LC/MS pos | 1.16 | 0.0377 | 0.0884 | Valine, leucine and isoleucine metabolism                |
| Octanoylcarnitine                                     | LC/MS pos | 1.16 | 0.07   | 0.1327 | Carnitine metabolism                                     |
| Isoleucine                                            | LC/MS pos | 1.15 | 0.0501 | 0.1081 | Valine, leucine and isoleucine metabolism                |
| Stearoylcarnitine                                     | LC/MS pos | 1.15 | 0.0808 | 0.1405 | Carnitine metabolism                                     |
| N1-methylguanosine                                    | LC/MS pos | 1.15 | 0.0818 | 0.1408 | Purine metabolism, guanine containing                    |
| Citrate                                               | GC/MS     | 1.13 | 0.0411 | 0.093  | Krebs cycle                                              |
| 13-methylmyristic acid                                | LC/MS neg | 1.12 | 0.022  | 0.0607 | Fatty acid, branched                                     |
| Undecanoate (11:0)                                    | LC/MS neg | 1.10 | 0.067  | 0.1295 | Medium chain fatty acid                                  |
| Carnitine                                             | LC/MS pos | 0.87 | 0.0121 | 0.04   | Carnitine metabolism                                     |
| Arachidonate (20:4n6)                                 | LC/MS neg | 0.87 | 0.095  | 0.1579 | Long chain fatty acid                                    |
| 2-hydroxypalmitate                                    | LC/MS neg | 0.86 | 0.0441 | 0.0985 | Fatty acid, monohydroxy                                  |
| TDTEKGEFLSEGGV                                        | LC/MS neg | 0.86 | 0.0569 | 0.117  | Fibrinogen cleavage peptide                              |
| 1-arachidonoylglycerophosphocholine                   | LC/MS pos | 0.84 | 0.0091 | 0.0322 | Lysolipid                                                |
| Riboflavin (Vitamin B2)                               | LC/MS pos | 0.84 | 0.0232 | 0.0626 | Riboflavin metabolism                                    |
| Mannose                                               | GC/MS     | 0.81 | 0.0792 | 0.139  | Fructose, mannose, galactose, starch, sucrose metabolism |
| 2-arachidonoylglycerophosphocholine                   | LC/MS pos | 0.80 | 0.0554 | 0.1168 | Lysolipid                                                |
| Uridine                                               | LC/MS neg | 0.80 | 0.099  | 0.163  | Pyrimidine metabolism, uracil containing                 |
| 1-myristoylglycerophosphocholine                      | LC/MS pos | 0.77 | 0.0051 | 0.0229 | Lysolipid                                                |
| Azelate (nonanedioate)                                | LC/MS neg | 0.77 | 0.0322 | 0.0776 | Fatty acid, dicarboxylate                                |
| Heme                                                  | LC/MS pos | 0.77 | 0.0772 | 0.1367 | Hemoglobin and porphyrin metabolism                      |
| Flavin adenine dinucleotide (FAD)                     | LC/MS neg | 0.76 | 0.0018 | 0.0127 | Riboflavin metabolism                                    |
| Serotonin (5HT)                                       | LC/MS pos | 0.75 | 0.0108 | 0.0362 | Tryptophan metabolism                                    |
| Glycerophosphorylcholine (GPC)                        | LC/MS pos | 0.75 | 0.0734 | 0.1355 | Glycerolipid metabolism                                  |
| N-acetylhistidine                                     | LC/MS neg | 0.75 | 0.0747 | 0.1355 | Histidine metabolism                                     |
| 11-dehydrocorticosterone                              | LC/MS neg | 0.74 | 0.0322 | 0.0776 | Sterol/Steroid                                           |
| Hexanoylglycine                                       | LC/MS neg | 0.72 | 0.0257 | 0.0661 | Fatty acid metabolism                                    |
| Guanosine                                             | LC/MS neg | 0.72 | 0.0534 | 0.1139 | Purine metabolism, guanine containing                    |
| 7- $\alpha$ -hydroxy-3-oxo-4-cholestenoate (7-Hoca)   | LC/MS neg | 0.68 | 0.0047 | 0.0215 | Sterol/Steroid                                           |
| Phenylacetylglycine                                   | LC/MS neg | 0.68 | 0.0397 | 0.0908 | Phenylalanine & tyrosine metabolism                      |
| N-acetylphenylalanine                                 | LC/MS neg | 0.67 | 0.0148 | 0.0456 | Phenylalanine & tyrosine metabolism                      |
| Caproate (6:0)                                        | LC/MS neg | 0.65 | 0.0011 | 0.0087 | Medium chain fatty acid                                  |
| Catechol sulfate                                      | LC/MS neg | 0.65 | 0.0107 | 0.0362 | Benzoate metabolism                                      |
| Phosphoenolpyruvate (PEP)                             | GC/MS     | 0.65 | 0.0662 | 0.1294 | Glycolysis, gluconeogenesis, pyruvate metabolism         |
| Corticosterone                                        | LC/MS pos | 0.61 | 0.0008 | 0.0075 | Sterol/Steroid                                           |

## Online Supporting Material

|                       |           |      |        |        |                       |
|-----------------------|-----------|------|--------|--------|-----------------------|
| Palmitoleate (16:1n7) | LC/MS neg | 0.60 | 0.0358 | 0.085  | Long chain fatty acid |
| Quinate               | GC/MS     | 0.57 | 0.0573 | 0.117  | Food component/Plant  |
| 12-HETE               | LC/MS neg | 0.51 | 0.0318 | 0.0776 | Eicosanoid            |
| $\beta$ -muricholate  | LC/MS neg | 0.38 | 0.0039 | 0.0195 | Bile acid metabolism  |
| Deoxycholate          | LC/MS neg | 0.36 | 0.0023 | 0.0139 | Bile acid metabolism  |
| Taurodeoxycholate     | LC/MS neg | 0.21 | 0.018  | 0.0529 | Bile acid metabolism  |

---

<sup>1</sup>C, control mice; FC, fold-change for concentration of metabolites derived from U mice in relation to C; GC, gas chromatography; LC, liquid chromatography; MS, mass spectrometry; *P*, *P* value; *Q*, *Q* value; U, undernourished mice.
