# Supplementary material
Source: PubMed Central journal article supplement (PMC3927544)
Supplement: jn.113.183731_nutrition183731SupplementaryData8.pdf [file jn.113.183731_nutrition183731SupplementaryData8.pdf]

## Online Supporting Material

**Supplemental Table 6.** Stool metabolites that differed ( $P \leq 0.10$ ) between C and U mice at d 16 of age<sup>1</sup>

| Metabolite                            | Method    | FC   | P                     | Q      | Pathway                                                  |
|---------------------------------------|-----------|------|-----------------------|--------|----------------------------------------------------------|
| Kynurenate                            | LC/MS neg | 3.22 | 0.0016                | 0.0146 | Tryptophan metabolism                                    |
| Taurolithocholate 3-sulfate           | LC/MS neg | 3.13 | 0.0011                | 0.0114 | Bile acid metabolism                                     |
| Oxamate                               | GC/MS     | 2.57 | 0.0079                | 0.0257 | Chemical                                                 |
| Undecanedioate                        | LC/MS neg | 2.51 | $6.05 \times 10^{-5}$ | 0.0023 | Fatty acid, dicarboxylate                                |
| Agmatine                              | GC/MS     | 2.30 | 0.0235                | 0.0456 | Polyamine metabolism                                     |
| 1-stearoylglycerophosphoinositol      | LC/MS neg | 2.29 | 0.0711                | 0.0813 | Lysolipid                                                |
| 1-stearoylglycerophosphoglycerol      | LC/MS neg | 2.21 | 0.0178                | 0.0406 | Lysolipid                                                |
| Lathosterol                           | GC/MS     | 1.92 | 0.0012                | 0.0114 | Sterol/Steroid                                           |
| Myristate (14:0)                      | LC/MS neg | 1.89 | 0.0073                | 0.0252 | Long chain fatty acid                                    |
| Laurate (12:0)                        | LC/MS neg | 1.86 | 0.0575                | 0.071  | Medium chain fatty acid                                  |
| 2-palmitoylglycerophosphoethanolamine | LC/MS neg | 1.78 | 0.0632                | 0.0762 | Lysolipid                                                |
| Putrescine                            | GC/MS     | 1.68 | 0.0319                | 0.0558 | Polyamine metabolism                                     |
| 1-palmitoylglycerophosphoethanolamine | LC/MS neg | 1.63 | 0.0634                | 0.0762 | Lysolipid                                                |
| 19-methylarachidic acid               | GC/MS     | 1.61 | 0.0185                | 0.0406 | Fatty acid, branched                                     |
| Docosadienoate (22:2n6)               | LC/MS neg | 1.60 | 0.0243                | 0.0458 | Long chain fatty acid                                    |
| Pregnen-diol disulfate                | LC/MS neg | 1.52 | 0.0302                | 0.0547 | Sterol/Steroid                                           |
| D-urobilin                            | LC/MS pos | 1.52 | 0.0603                | 0.0738 | Hemoglobin and porphyrin metabolism                      |
| 7-methylguanine                       | GC/MS     | 1.52 | 0.0872                | 0.0897 | Purine metabolism, guanine containing                    |
| Heneicosanoate (21:0)                 | GC/MS     | 1.46 | 0.0729                | 0.0821 | Long chain fatty acid                                    |
| Erucate (22:1n9)                      | GC/MS     | 1.45 | 0.0369                | 0.0594 | Long chain fatty acid                                    |
| Arachidate (20:0)                     | GC/MS     | 1.43 | 0.0336                | 0.0573 | Long chain fatty acid                                    |
| N2-acetyllysine                       | LC/MS pos | 1.41 | 0.0235                | 0.0456 | Lysine metabolism                                        |
| Palmitate (16:0)                      | LC/MS neg | 1.28 | 0.0167                | 0.0403 | Long chain fatty acid                                    |
| 2-hydroxybutyrate (AHB)               | GC/MS     | 1.26 | 0.0842                | 0.0897 | Cysteine, methionine, SAM, taurine metabolism            |
| Glutamate                             | LC/MS pos | 0.86 | 0.038                 | 0.0594 | Glutamate metabolism                                     |
| Creatine                              | LC/MS pos | 0.81 | 0.034                 | 0.0576 | Creatine metabolism                                      |
| Fucosterol                            | GC/MS     | 0.79 | 0.089                 | 0.091  | Sterol/Steroid                                           |
| Adenine                               | GC/MS     | 0.79 | 0.0922                | 0.0934 | Purine metabolism, adenine containing                    |
| Leucylglutamate                       | LC/MS pos | 0.79 | 0.0956                | 0.0963 | Dipeptide                                                |
| Xanthine                              | LC/MS neg | 0.78 | 0.0377                | 0.0594 | Purine metabolism, (hypo)xanthine/inosine containing     |
| Allo-threonine                        | GC/MS     | 0.77 | 0.0189                | 0.0406 | Glycine, serine and threonine metabolism                 |
| Nicotinate                            | LC/MS neg | 0.77 | 0.0498                | 0.0651 | Nicotinate and nicotinamide metabolism                   |
| 4-hydroxycinnamate                    | LC/MS neg | 0.77 | 0.0798                | 0.0862 | Phenylalanine & tyrosine metabolism                      |
| Proline                               | LC/MS pos | 0.76 | 0.0258                | 0.0477 | Urea cycle; arginine-, proline-, metabolism              |
| $\beta$ -hydroxypyruvate              | GC/MS     | 0.76 | 0.0969                | 0.0965 | Glycine, serine and threonine metabolism                 |
| Pyridoxamine                          | LC/MS pos | 0.75 | 0.0472                | 0.0642 | Vitamin B6 metabolism                                    |
| Lactate                               | GC/MS     | 0.75 | 0.0773                | 0.0847 | Glycolysis, gluconeogenesis, pyruvate metabolism         |
| Taurine                               | GC/MS     | 0.74 | 0.0552                | 0.0699 | Cysteine, methionine, SAM, taurine metabolism            |
| Glycerate                             | GC/MS     | 0.74 | 0.0742                | 0.0828 | Glycolysis, gluconeogenesis, pyruvate metabolism         |
| Myo-inositol                          | GC/MS     | 0.74 | 0.0749                | 0.0831 | Inositol metabolism                                      |
| N-acetylaspartate (NAA)               | LC/MS neg | 0.73 | 0.027                 | 0.0493 | Alanine and aspartate metabolism                         |
| Aspartylleucine                       | LC/MS pos | 0.73 | 0.0476                | 0.0642 | Dipeptide                                                |
| Phenylalanylisoleucine                | LC/MS pos | 0.73 | 0.0703                | 0.0808 | Dipeptide                                                |
| Glycylisoleucine                      | LC/MS pos | 0.73 | 0.0757                | 0.0834 | Dipeptide                                                |
| Homoserine                            | GC/MS     | 0.73 | 0.0801                | 0.0862 | Glycine, serine and threonine metabolism                 |
| Uracil                                | GC/MS     | 0.73 | 0.0867                | 0.0897 | Pyrimidine metabolism, uracil containing                 |
| Deoxycarnitine                        | LC/MS pos | 0.72 | 0.0002                | 0.0072 | Carnitine metabolism                                     |
| Methionine sulfoxide                  | LC/MS pos | 0.72 | 0.0061                | 0.0236 | Cysteine, methionine, SAM, taurine metabolism            |
| 2-hydroxyglutarate                    | GC/MS     | 0.72 | 0.0573                | 0.071  | Fatty acid, dicarboxylate                                |
| Mannose                               | GC/MS     | 0.72 | 0.0685                | 0.0798 | Fructose, mannose, galactose, starch, sucrose metabolism |
| Ribose                                | GC/MS     | 0.72 | 0.0868                | 0.0897 | Nucleotide sugars, pentose metabolism                    |
| Glycerol 3-phosphate (G3P)            | GC/MS     | 0.71 | 0.0437                | 0.0631 | Glycerolipid metabolism                                  |

## Online Supporting Material

|                                       |           |      |        |        |                                                          |
|---------------------------------------|-----------|------|--------|--------|----------------------------------------------------------|
| Trans-uocanate                        | LC/MS pos | 0.71 | 0.0663 | 0.078  | Histidine metabolism                                     |
| N6-acetyllysine                       | LC/MS pos | 0.71 | 0.0982 | 0.0972 | Lysine metabolism                                        |
| Pipecolate                            | GC/MS     | 0.70 | 0.0394 | 0.0598 | Lysine metabolism                                        |
| Alanine                               | GC/MS     | 0.70 | 0.0517 | 0.0669 | Alanine and aspartate metabolism                         |
| Homocysteine                          | GC/MS     | 0.70 | 0.0656 | 0.0778 | Cysteine, methionine, SAM, taurine metabolism            |
| Vanillate                             | GC/MS     | 0.70 | 0.0732 | 0.0821 | Food component/Plant                                     |
| Hypotaurine                           | GC/MS     | 0.70 | 0.0799 | 0.0862 | Cysteine, methionine, SAM, taurine metabolism            |
| $\gamma$ -glutamylthreonine           | LC/MS pos | 0.69 | 0.0129 | 0.0353 | $\gamma$ -glutamyl                                       |
| Histidine                             | LC/MS neg | 0.69 | 0.024  | 0.0456 | Histidine metabolism                                     |
| Linoleate (18:2n6)                    | LC/MS neg | 0.69 | 0.047  | 0.0642 | Essential fatty acid                                     |
| Conjugated linoleate (18:2n7; 9Z,11E) | GC/MS     | 0.69 | 0.0563 | 0.0709 | Long chain fatty acid                                    |
| 3-(4-hydroxyphenyl)lactate            | LC/MS neg | 0.69 | 0.0716 | 0.0813 | Phenylalanine & tyrosine metabolism                      |
| Serine                                | GC/MS     | 0.69 | 0.0866 | 0.0897 | Glycine, serine and threonine metabolism                 |
| Tyrosylisoleucine                     | LC/MS pos | 0.69 | 0.0919 | 0.0934 | Dipeptide                                                |
| $\gamma$ -glutamyltyrosine            | LC/MS pos | 0.68 | 0.0024 | 0.016  | $\gamma$ -glutamyl                                       |
| $\gamma$ -glutamylglutamate           | LC/MS pos | 0.68 | 0.0057 | 0.0236 | $\gamma$ -glutamyl                                       |
| $\alpha$ -tocopherol                  | GC/MS     | 0.68 | 0.0078 | 0.0257 | Tocopherol metabolism                                    |
| Phenylalanine                         | LC/MS pos | 0.68 | 0.0123 | 0.0341 | Phenylalanine & tyrosine metabolism                      |
| 4-hydroxymandelate                    | GC/MS     | 0.68 | 0.0328 | 0.0565 | Benzoate metabolism                                      |
| Isoleucine                            | LC/MS pos | 0.67 | 0.0217 | 0.045  | Valine, leucine and isoleucine metabolism                |
| Glycylvaline                          | LC/MS pos | 0.67 | 0.032  | 0.0558 | Dipeptide                                                |
| Urate                                 | GC/MS     | 0.67 | 0.0483 | 0.0642 | Purine metabolism, urate metabolism                      |
| Cytosine                              | GC/MS     | 0.67 | 0.0567 | 0.0709 | Pyrimidine metabolism, cytidine containing               |
| 1-linoleoylglycerol (1-monolinolein)  | GC/MS     | 0.67 | 0.0624 | 0.076  | Monoacylglycerol                                         |
| Phenylalanylglutamate                 | LC/MS pos | 0.67 | 0.0856 | 0.0897 | Dipeptide                                                |
| N-acetylglucosamine                   | GC/MS     | 0.67 | 0.0963 | 0.0964 | Aminosugars metabolism                                   |
| Pyridoxal                             | LC/MS pos | 0.66 | 0.0018 | 0.0146 | Pyridoxal metabolism                                     |
| 3,4-dihydroxybenzoate                 | GC/MS     | 0.66 | 0.0435 | 0.0631 | Benzoate metabolism                                      |
| 2-aminopentanoate                     | GC/MS     | 0.66 | 0.0443 | 0.0634 | Lysine metabolism                                        |
| Fumarate                              | GC/MS     | 0.66 | 0.0648 | 0.0774 | Krebs cycle                                              |
| Tyrosylleucine                        | LC/MS pos | 0.66 | 0.07   | 0.0808 | Dipeptide                                                |
| Adenosine                             | LC/MS pos | 0.65 | 0.0027 | 0.0163 | Purine metabolism, adenine containing                    |
| Tryptophan                            | LC/MS pos | 0.65 | 0.0187 | 0.0406 | Tryptophan metabolism                                    |
| Glycylleucine                         | LC/MS pos | 0.65 | 0.0259 | 0.0477 | Dipeptide                                                |
| N-acetylserine                        | GC/MS     | 0.65 | 0.0396 | 0.0598 | Glycine, serine and threonine metabolism                 |
| Glycerol 2-phosphate                  | GC/MS     | 0.65 | 0.0552 | 0.0699 | Chemical                                                 |
| $\gamma$ -glutamylphenylalanine       | LC/MS pos | 0.64 | 0.002  | 0.0146 | $\gamma$ -glutamyl                                       |
| N-acetylneuraminate                   | LC/MS pos | 0.64 | 0.0089 | 0.0284 | Aminosugars metabolism                                   |
| 2-hydroxystearate                     | LC/MS neg | 0.64 | 0.0136 | 0.0366 | Fatty acid, monohydroxy                                  |
| Glycerol                              | GC/MS     | 0.64 | 0.0187 | 0.0406 | Glycerolipid metabolism                                  |
| $\gamma$ -glutamylmethionine          | LC/MS pos | 0.63 | 0.0045 | 0.0222 | $\gamma$ -glutamyl                                       |
| Glycylglycine                         | GC/MS     | 0.63 | 0.017  | 0.0405 | Dipeptide                                                |
| Diaminopimelate                       | GC/MS     | 0.63 | 0.0415 | 0.0613 | Lysine metabolism                                        |
| N-acetylmethionine                    | LC/MS neg | 0.63 | 0.0452 | 0.0642 | Cysteine, methionine, SAM, taurine metabolism            |
| Tyrosine                              | LC/MS pos | 0.62 | 0.0024 | 0.016  | Phenylalanine & tyrosine metabolism                      |
| Valine                                | LC/MS pos | 0.62 | 0.0111 | 0.0323 | Valine, leucine and isoleucine metabolism                |
| Cis-vaccenate (18:1n7)                | GC/MS     | 0.62 | 0.0114 | 0.0327 | Long chain fatty acid                                    |
| Pyruvate                              | GC/MS     | 0.62 | 0.0159 | 0.039  | Glycolysis, gluconeogenesis, pyruvate metabolism         |
| Galactose                             | GC/MS     | 0.62 | 0.0495 | 0.0651 | Fructose, mannose, galactose, starch, sucrose metabolism |
| Glycylproline                         | LC/MS pos | 0.61 | 0.0009 | 0.0114 | Dipeptide                                                |
| Methionine                            | LC/MS pos | 0.61 | 0.0098 | 0.0293 | Cysteine, methionine, SAM, taurine metabolism            |
| Methylphosphate                       | GC/MS     | 0.61 | 0.0147 | 0.0374 | Purine and pyrimidine metabolism                         |
| 4-hydroxyphenylpyruvate               | LC/MS neg | 0.61 | 0.0371 | 0.0594 | Phenylalanine & tyrosine metabolism                      |
| 3-phenylpropionate (hydrocinnamate)   | GC/MS     | 0.61 | 0.0377 | 0.0594 | Phenylalanine & tyrosine metabolism                      |
| Arginylisoleucine                     | LC/MS pos | 0.61 | 0.0478 | 0.0642 | Dipeptide                                                |
| Aspartate                             | GC/MS     | 0.61 | 0.0482 | 0.0642 | Alanine and aspartate metabolism                         |
| Leucine                               | LC/MS pos | 0.60 | 0.0074 | 0.0252 | Valine, leucine and isoleucine metabolism                |

## Online Supporting Material

|                                                              |           |      |                       |        |                                                          |
|--------------------------------------------------------------|-----------|------|-----------------------|--------|----------------------------------------------------------|
| Phosphoethanolamine                                          | GC/MS     | 0.60 | 0.0206                | 0.0432 | Glycerolipid metabolism                                  |
| N-acetylmuramate                                             | LC/MS neg | 0.60 | 0.036                 | 0.0593 | Fructose, mannose, galactose, starch, sucrose metabolism |
| Fucose                                                       | GC/MS     | 0.60 | 0.0395                | 0.0598 | Aminosugars metabolism                                   |
| Syringic acid                                                | GC/MS     | 0.60 | 0.0398                | 0.0598 | Food component/Plant                                     |
| Threonylisoleucine                                           | LC/MS pos | 0.59 | 0.0478                | 0.0642 | Dipeptide                                                |
| Hexadecanedioate                                             | LC/MS neg | 0.58 | 0.001                 | 0.0114 | Fatty acid, dicarboxylate                                |
| $\gamma$ -glutamylleucine                                    | LC/MS pos | 0.58 | 0.0019                | 0.0146 | $\gamma$ -glutamyl                                       |
| $\gamma$ -tocopherol                                         | GC/MS     | 0.57 | 0.0231                | 0.0456 | Tocopherol metabolism                                    |
| Ornithine                                                    | GC/MS     | 0.57 | 0.05                  | 0.0651 | Urea cycle; arginine-, proline-, metabolism              |
| Histidylvaline                                               | LC/MS pos | 0.57 | 0.0534                | 0.0686 | Dipeptide                                                |
| O-acetylserine                                               | GC/MS     | 0.57 | 0.0666                | 0.078  | Glycine, serine and threonine metabolism                 |
| Sorbitol                                                     | GC/MS     | 0.56 | $1.02 \times 10^{-5}$ | 0.0006 | Fructose, mannose, galactose, starch, sucrose metabolism |
| 3-hydroxypyridine                                            | GC/MS     | 0.56 | 0.0003                | 0.0072 | Chemical                                                 |
| Glycyltyrosine                                               | LC/MS pos | 0.56 | 0.0062                | 0.0236 | Dipeptide                                                |
| Glucose                                                      | GC/MS     | 0.56 | 0.0074                | 0.0252 | Glycolysis, gluconeogenesis, pyruvate metabolism         |
| Tryptophyllleucine                                           | LC/MS pos | 0.56 | 0.0319                | 0.0558 | Dipeptide                                                |
| Histidylisoleucine                                           | LC/MS pos | 0.55 | 0.0096                | 0.0293 | Dipeptide                                                |
| Thymine                                                      | GC/MS     | 0.55 | 0.0238                | 0.0456 | Pyrimidine metabolism, thymine containing                |
| 2-deoxyribose                                                | GC/MS     | 0.55 | 0.0356                | 0.0591 | Nucleotide sugars, pentose metabolism                    |
| N-acetylmannosamine                                          | GC/MS     | 0.55 | 0.0369                | 0.0594 | Aminosugars metabolism                                   |
| Sarcosine (N-Methylglycine)                                  | GC/MS     | 0.54 | 0.0146                | 0.0374 | Glycine, serine and threonine metabolism                 |
| 3-methyl-2-oxobutyrates                                      | LC/MS neg | 0.54 | 0.0172                | 0.0405 | Valine, leucine and isoleucine metabolism                |
| 2-hydroxypalmitate                                           | LC/MS neg | 0.54 | 0.0422                | 0.062  | Fatty acid, monohydroxy                                  |
| Campesterol                                                  | GC/MS     | 0.53 | 0.0034                | 0.0179 | Sterol/Steroid                                           |
| Linolenate [ $\alpha$ or $\gamma$ ; (18:3n3 or 6)]           | LC/MS neg | 0.53 | 0.0236                | 0.0456 | Essential fatty acid                                     |
| Phenylalanylaspertate                                        | LC/MS pos | 0.53 | 0.0461                | 0.0642 | Dipeptide                                                |
| Val-val-val                                                  | LC/MS pos | 0.52 | 0.0011                | 0.0114 | Polypeptide                                              |
| 4-methylthio-2-oxobutanoate                                  | GC/MS     | 0.52 | 0.0062                | 0.0236 | Cysteine, methionine, SAM, taurine metabolism            |
| $\beta$ -tocotrienol                                         | GC/MS     | 0.52 | 0.0139                | 0.0369 | Tocopherol metabolism                                    |
| 4-hydroxy-2-oxoglutaric acid                                 | GC/MS     | 0.52 | 0.0159                | 0.039  | Fatty acid, dicarboxylate                                |
| 2-oleoylglycerol (2-monoolein)                               | GC/MS     | 0.52 | 0.0188                | 0.0406 | Monoacylglycerol                                         |
| Tyrosylvaline                                                | LC/MS pos | 0.52 | 0.0455                | 0.0642 | Dipeptide                                                |
| Isobar: betaine aldehyde, N-methyl-diethanolamine            | LC/MS pos | 0.52 | 0.0854                | 0.0897 | Glycine, serine and threonine metabolism                 |
| Tyrosylglutamate                                             | LC/MS pos | 0.51 | 0.0181                | 0.0406 | Dipeptide                                                |
| 2-linoleoylglycerol (2-monolinolein)                         | GC/MS     | 0.51 | 0.0352                | 0.0591 | Monoacylglycerol                                         |
| $\alpha$ -hydroxyisovalerate                                 | GC/MS     | 0.50 | 0.0031                | 0.0178 | Valine, leucine and isoleucine metabolism                |
| N-acetyl-galactosamine                                       | GC/MS     | 0.50 | 0.022                 | 0.0451 | Aminosugars metabolism                                   |
| 3-methyl-2-oxovalerate                                       | LC/MS neg | 0.50 | 0.0223                | 0.0451 | Valine, leucine and isoleucine metabolism                |
| Histidylleucine                                              | LC/MS pos | 0.50 | 0.0312                | 0.0558 | Dipeptide                                                |
| Lysylvaline                                                  | LC/MS pos | 0.50 | 0.041                 | 0.061  | Dipeptide                                                |
| L-urobilin                                                   | LC/MS pos | 0.49 | 0.0175                | 0.0406 | Hemoglobin and porphyrin metabolism                      |
| Phenylpyruvate                                               | LC/MS neg | 0.48 | 0.0051                | 0.0236 | Phenylalanine & tyrosine metabolism                      |
| Dihydrocholesterol                                           | GC/MS     | 0.48 | 0.0052                | 0.0236 | Sterol/Steroid                                           |
| Xylulose                                                     | GC/MS     | 0.48 | 0.0102                | 0.0301 | Nucleotide sugars, pentose metabolism                    |
| 3,4-dihydroxyphenylacetate                                   | GC/MS     | 0.48 | 0.0151                | 0.0381 | Phenylalanine & tyrosine metabolism                      |
| 4-methyl-2-oxopentanoate                                     | LC/MS neg | 0.47 | 0.0141                | 0.0369 | Valine, leucine and isoleucine metabolism                |
| $\gamma$ -glutamylisoleucine                                 | LC/MS pos | 0.46 | 0.0004                | 0.0087 | $\gamma$ -glutamyl                                       |
| Phenyllactate (PLA)                                          | LC/MS neg | 0.46 | 0.0033                | 0.0179 | Phenylalanine & tyrosine metabolism                      |
| Lysylisoleucine                                              | LC/MS pos | 0.46 | 0.0067                | 0.0251 | Dipeptide                                                |
| Hyocholate                                                   | LC/MS neg | 0.46 | 0.0071                | 0.0252 | Bile acid metabolism                                     |
| Campestanol                                                  | GC/MS     | 0.45 | 0.0004                | 0.0087 | Food component/Plant                                     |
| Cytidine                                                     | LC/MS pos | 0.45 | 0.0036                | 0.0179 | Pyrimidine metabolism, cytidine containing               |
| Cholate                                                      | LC/MS neg | 0.45 | 0.02                  | 0.0422 | Bile acid metabolism                                     |
| Lysylleucine                                                 | LC/MS pos | 0.44 | 0.0019                | 0.0146 | Dipeptide                                                |
| Oleic ethanolamide                                           | LC/MS neg | 0.44 | 0.0119                | 0.0335 | Endocannabinoid                                          |
| 5 $\alpha$ -pregnan-3 $\alpha$ ,20 $\beta$ -diol disulfate 1 | LC/MS neg | 0.44 | 0.0394                | 0.0598 | Sterol/Steroid                                           |

## Online Supporting Material

|                                  |           |      |                       |        |                                             |
|----------------------------------|-----------|------|-----------------------|--------|---------------------------------------------|
| Ribulose                         | GC/MS     | 0.43 | 0.0075                | 0.0252 | Nucleotide sugars, pentose metabolism       |
| 2-hydroxy-3-methylvalerate       | GC/MS     | 0.41 | 0.0006                | 0.0112 | Valine, leucine and isoleucine metabolism   |
| 3-dehydrocholate                 | LC/MS pos | 0.41 | 0.0026                | 0.0163 | Bile acid metabolism                        |
| $\alpha$ -ketoglutarate          | GC/MS     | 0.40 | 0.0091                | 0.0287 | Krebs cycle                                 |
| Sitostanol                       | GC/MS     | 0.39 | 0.0011                | 0.0114 | Food component/Plant                        |
| Iduronic acid                    | GC/MS     | 0.39 | 0.003                 | 0.0175 | Aminosugars metabolism                      |
| Arginine                         | LC/MS pos | 0.38 | 0.0051                | 0.0236 | Urea cycle; arginine-, proline-, metabolism |
| $\alpha$ -glutamyllysine         | GC/MS     | 0.38 | 0.0059                | 0.0236 | Dipeptide                                   |
| $\alpha$ -hydroxyisocaproate     | GC/MS     | 0.36 | 0.0014                | 0.0127 | Valine, leucine and isoleucine metabolism   |
| 12,13-hydroxyoctadec-9(Z)-enoate | LC/MS neg | 0.36 | 0.002                 | 0.0147 | Fatty acid, dihydroxy                       |
| Ferulate                         | LC/MS neg | 0.36 | 0.0053                | 0.0236 | Food component/Plant                        |
| Biliverdin                       | LC/MS pos | 0.36 | 0.0872                | 0.0897 | Hemoglobin and porphyrin metabolism         |
| $\beta$ -muricholate             | LC/MS pos | 0.34 | 0.0027                | 0.0163 | Bile acid metabolism                        |
| 3-(3-hydroxyphenyl)propionate    | GC/MS     | 0.34 | 0.0094                | 0.0292 | Phenylalanine & tyrosine metabolism         |
| 3-(4-hydroxyphenyl)propionate    | GC/MS     | 0.33 | 0.0011                | 0.0114 | Phenylalanine & tyrosine metabolism         |
| 2-oxindole-3-acetate             | LC/MS pos | 0.29 | 0.0059                | 0.0236 | Food component/Plant                        |
| Dihydroferulic acid              | LC/MS neg | 0.26 | 0.0007                | 0.0113 | Food component/Plant                        |
| Arabinose                        | GC/MS     | 0.25 | 0.0055                | 0.0236 | Nucleotide sugars, pentose metabolism       |
| Leu-leu-leu                      | LC/MS pos | 0.24 | $2.70 \times 10^{-6}$ | 0.0003 | Polypeptide                                 |
| $\alpha$ -muricholate            | LC/MS pos | 0.22 | 0.0007                | 0.0113 | Bile acid metabolism                        |
| Chenodeoxycholate                | LC/MS neg | 0.20 | $3.71 \times 10^{-5}$ | 0.0017 | Bile acid metabolism                        |
| Xylose                           | GC/MS     | 0.18 | 0.0035                | 0.0179 | Nucleotide sugars, pentose metabolism       |
| Deoxycholate                     | LC/MS neg | 0.06 | $3.49 \times 10^{-6}$ | 0.0003 | Bile acid metabolism                        |

---

<sup>1</sup>C, control mice; FC, fold-change for concentration of metabolites derived from U mice in relation to C; GC, gas chromatography; LC, liquid chromatography; MS, mass spectrometry; *P*, *P* value; *Q*, *Q* value; U, undernourished mice.
